# Supplementary material for: Mechanism of Zhinao Capsule in Treating Alzheimer's Disease Based on Network Pharmacology Analysis and Molecular Docking Validation
Source: J Healthc Eng. 2022 Aug 18;2022:5708769. doi: 10.1155/2022/5708769 (PMC9410932; doi:10.1155/2022/5708769)
Supplement: Supplementary Materials — include Supplementary Figure S1, Supplementary Table 1, and Supplementary Table 2. Figure S1: the experimental protocol was approved by the Animal Ethics Committee of Anhui University of Chinese Medicine. Table S1: information on 55 potential components in ZNC. Table S2: results of the molecular docking of 10 targets with components. [file 5708769.f1.zip]

Archive with 3 entries (3 files):
- 5708769.f1/Supplementary Figure 1.pdf
- 5708769.f1/Supplementary Table 1 (1).docx
- 5708769.f1/Supplementary Table 2  (1).docx
